# Supplementary material for: Force-induced strengthening of a mechanochromic polymer based on a naphthalene-fused cyclobutane mechanophore
Source: Royal Society of Chemistry journal article supplement (doi:10.1039/d1cc05305a), 2021-01-01
Supplement: d1cc05305a1.pdf [file d1cc05305a1.pdf]

## Electronic Supplementary Information

For

### Force induced strengthening of a mechanochromic polymer based on naphthalene fused cyclobutane mechanophore

Taisheng Wang,<sup>a,b</sup> Haoxiang Wang,<sup>a</sup> Lei Shen,<sup>a</sup> Na Zhang<sup>a,b\*</sup>

<sup>a</sup>*School of Materials Science and Engineering, Nanjing Institute of Technology, Nanjing, 211167, P. R. China.*

<sup>b</sup>*Jiangsu Key Laboratory of Advanced Structural Materials and Application Technology, Nanjing, 211167, P. R. China.*

Correspondence to: Na Zhang (Email: zhangna@njit.edu.cn)

#### Experimental section

##### Materials and measurements

Unless otherwise stated, all reagents and solvents were obtained from Aladdin Co. Ltd. And used without further purification. Unless otherwise noted, all reactions were carried out under ambient atmosphere.

<sup>1</sup>H NMR was recorded on 400 MHz (Bruker ARX300) and <sup>13</sup>C NMR spectra were recorded on Bruker 100 MHz spectrometer at room temperature with CDCl<sub>3</sub> or d<sub>6</sub>-DMSO as the solvents and tetramethylsilane (TMS) as the internal standard. Electrospray ionization (ESI) mass spectra were obtained on a Finnigan LCQ Advantage ion trap mass spectrometer (ThermoFisher Corporation). Thermogravimetric Analysis (TGA) was carried out on Netzsch Instrument TG 209 F1. Fluorescence spectra measurements were performed on a Shimadzu RF-5301PC spectrofluorophotometer. Absorption spectra were determined on a Pgeneral UV-Vis TU-1901 spectrophotometer. Uniaxial tensile tests were performed on TMA Q400. Specimens were cut in a rectangle shape using a normalized cutter with a central part of 30 mm in length, 5 mm in width. The number average molecular weights (M<sub>n</sub>), weight average molecular weight (M<sub>w</sub>) and polydispersities (PDI) were measured by GPC on a Waters 150 instrument equipped with 10<sup>3</sup>, 10<sup>4</sup> and 10<sup>5</sup> Å Waters Ultrastyrigel columns and using THF (1.0 mL/min) as the eluent at 25 °C. Calibration was against polystyrene standards.

##### Molecular Simulation

All Density Functional Theory (DFT) calculations were performed using the ORCA version 2.8 program package.<sup>S1</sup> Structure optimization was performed based on the Density Function Theory (DFT). Following each optimization, the vibrational frequencies were calculated to make sure that all the optimized structures were the stable geometric structures. The basis set used here was B3LYP. The transition states were located using Synchronous Transit-guided Quasi-Newton (STQN) method<sup>S2</sup>. Transition states are

characterized by having exactly one vibrational mode with an imaginary frequency. They are located on so-called first order saddle points on the potential energy surface, which is local maxima in exactly one direction (the reaction pathway), and a local minima in all other directions.

### Ultrasound Sonication

Ultrasound experiments were performed with a 11.5 mm (diameter) titanium solid probe (Scientz). For typical sonication experiment, polymers were dissolved in THF with a concentration of 4 mg/mL. The solution was then transferred to a 3-necked cell in an ice bath and sparged with nitrogen for 30 min. A pulse sequence of 2s on/2s off was applied to the solution at a power of 8.7 W/cm<sup>2</sup>. The temperature of the system was maintained at 0-5 °C. The sonication was carried out under a nitrogen atmosphere.

Aliquots (1 mL, 4 mg/mL) at given time were removed from the cell for GPC and UV-Vis test. After sonication, the residual solution was precipitated by methanol and redissolved in CDCl<sub>3</sub> (~20 mg/mL) for <sup>1</sup>H NMR measurement.

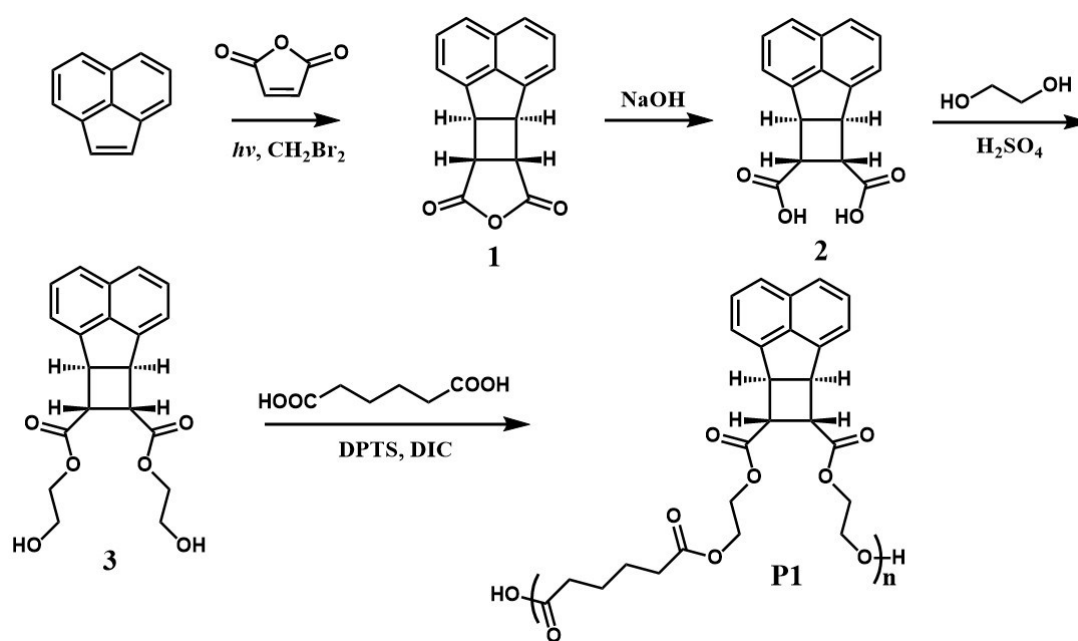

**Figure S1** Synthetic route of naphthalene fused cyclobutane (NCD) mechanophore and the related polyester **P1** carrying NCD on its backbone.

### Synthesis of compound 2

A solution of acenaphthylene (8.0 g, 52.6 mmol) and maleic anhydride (15.0 g, 153.1 mmol) in 150 mL dibromomethane was irradiated for 48 h. The insoluble substance was filtrated. Evaporation of the filtrate left a solid residue, which was treated with 150 mL diethyl ether to dissolve unreacted reactants. The ether-insoluble residue was recrystallized from benzene to give compound **1**. The compound **1** was added to a solution of 40 mL 1.5 N methanolic KOH. After refluxed for 2 h, the reaction mixture was poured into ice bath and acidified with concentrated hydrochloric acid. The precipitate was filtered, dried, and recrystallized from acetone to give the

target compound **2** (2.5 g, yield: 44 %).

<sup>1</sup>H NMR (400 MHz, d<sub>6</sub>-DMSO): δ 12.6 (s, 2H), 7.73 (d, 2H), 7.52 (t, 2H), 7.37 (d, 2H), 4.35 (d, 2H), 3.13 (d, 2H). <sup>13</sup>C NMR (100 MHz, d<sub>6</sub>-DMSO): δ 174.0, 146.8, 139.9, 132.0, 128.8, 123.7, 120.0, 47.3, 44.7. ESI-MS (m/z): Calculated for C<sub>16</sub>H<sub>12</sub>O<sub>4</sub> (M+H<sup>+</sup>): 269.07, found (M+H<sup>+</sup>): 269.08.

### Synthesis of compound **3**

Compound **2** (2.0 g, 7.5 mmol) and catalyst concentrated H<sub>2</sub>SO<sub>4</sub> (0.5 mL) was added to the 40 mL glycol. After the mixture was refluxed for 4 h, the solution was poured into 100 mL water and extracted with dichloromethane. The extract was dried with Na<sub>2</sub>SO<sub>4</sub> and evaporated to give the crude product. After recrystallization from ethyl acetate, the target compound **3** (2.2 g, yield: 81 %) was obtained.

<sup>1</sup>H NMR (400 MHz, CDCl<sub>3</sub>): δ 7.67 (d, 2H), 7.48 (t, 2H), 7.35 (d, 2H), 4.53 (d, 2H), 4.40 (m, 2H), 4.23 (m, 2H), 3.86 (m, 4H), 3.32 (d, 2H), 2.73 (s, 2H). <sup>13</sup>C NMR (100 MHz, CDCl<sub>3</sub>): δ 168.3, 140.7, 135.1, 127.3, 123.6, 119.1, 115.1, 62.2, 56.0, 42.4, 40.1. ESI-MS (m/z): Calculated for C<sub>20</sub>H<sub>20</sub>O<sub>6</sub> (M+H<sup>+</sup>): 357.13, found (M+H<sup>+</sup>): 357.13.

### Synthesis of polyester **P1**

Compound **3** (0.419 g, 1.25 mmol, 1 eq.), adipic acid (0.183 g, 1.25 mmol, 1 eq.) and dimethylaminopyridinium toluenesulfonate (0.146 g, 0.5 mmol, 0.4 eq.) were added to a 10 mL flask. 2 mL dry CH<sub>2</sub>Cl<sub>2</sub> was added by using a syringe. The solution was stirred at room temperature until solution became homogeneous. *N,N*-diisopropylcarbodiimide (0.58 mL, 3.75 mmol, 3 eq.) was added to the mixture by using a syringe. The solution was stirred at room temperature for 96 h. The mixture was precipitated twice from CH<sub>2</sub>Cl<sub>2</sub> into MeOH to afford a light yellow solid **P1** (0.53 g, yield: 88 %).

### Synthesis of reference compound **R1**

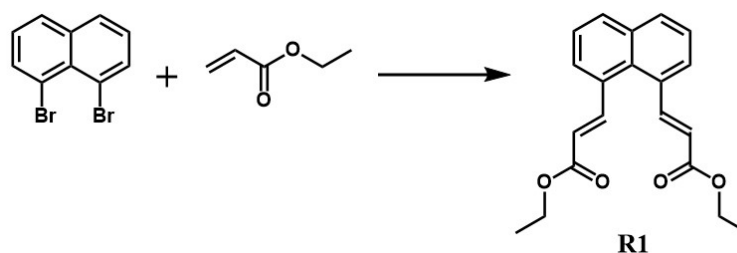

A 50 mL Schlenk tube was charged with a mixture of 1,8-dibromonaphthalene (1.5 g, 5.24 mmol), PdCl<sub>2</sub>(PPh<sub>3</sub>)<sub>2</sub> (0.368 g, 0.0088 mmol, 6mg), ethyl acrylate (2.79 mL, 26.2 mmol), and NEt<sub>3</sub> (1.82 mL, 13.1 mmol) in DMF (30 mL) under nitrogen. The flask was sealed under nitrogen after three vacuum/nitrogen cycles, heated to 80 °C for 2 days, and then concentrated under vacuum. The crude was dissolved in CH<sub>2</sub>Cl<sub>2</sub>, washed with brine (40 mL×5), dried over Na<sub>2</sub>SO<sub>4</sub>, and concentrated in vacuo. The product was purified by column chromatography (silica gel, hexanes/ethyl acetate = 10:1) yielded **R1** as a yellow solid (1.67 g, 83%).

<sup>1</sup>H NMR (400 MHz, CDCl<sub>3</sub>): δ 8.32 (d, 2H), 7.86 (d, 2H), 7.58 (d, 2H), 7.46 (t, 2H), 6.30 (d, 2H), 4.25 (q, 4H), 1.32 (t, 6H). <sup>13</sup>C NMR (100 MHz, CDCl<sub>3</sub>): δ 166.3, 146.8, 134.4, 133.7, 130.6, 130.0, 128.2, 125.9, 120.0, 60.5, 14.2. ESI-MS (m/z): Calculated for

$C_{20}H_{20}O_4$  ( $M+H^+$ ): 325.14, found ( $M+H^+$ ): 325.14.

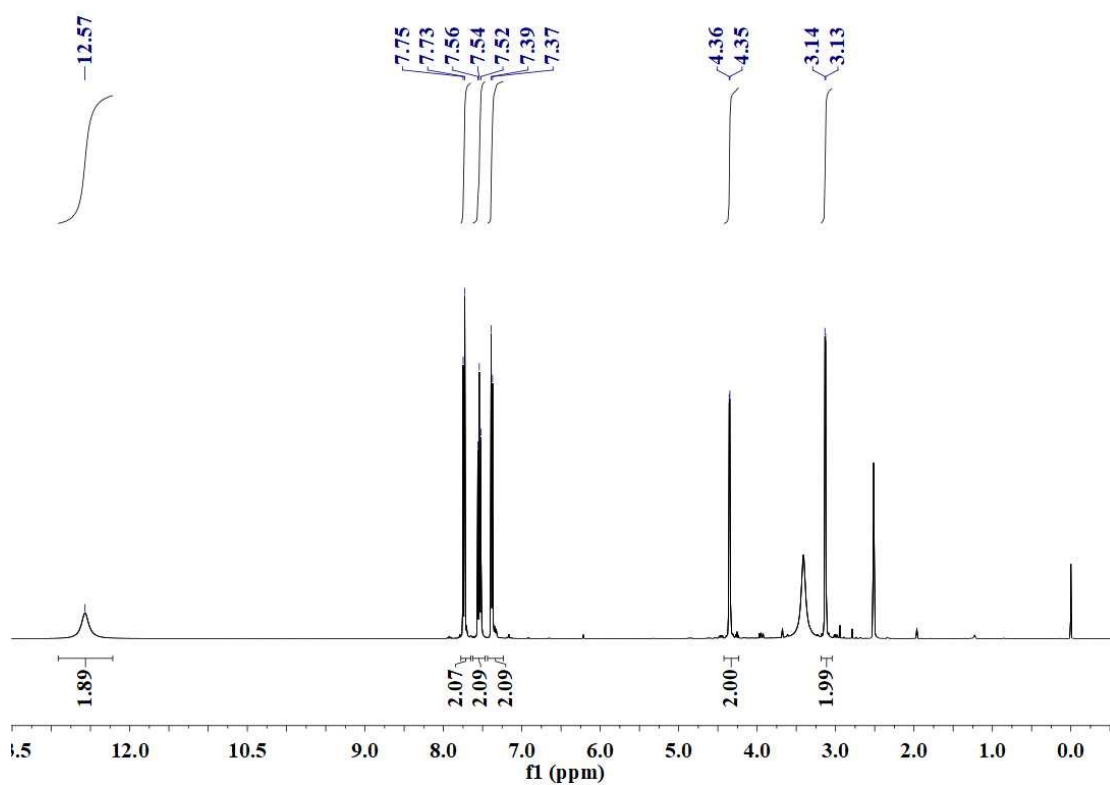

Figure S2  $^1H$  NMR spectrum of compound 2 in  $d_6$ -DMSO.

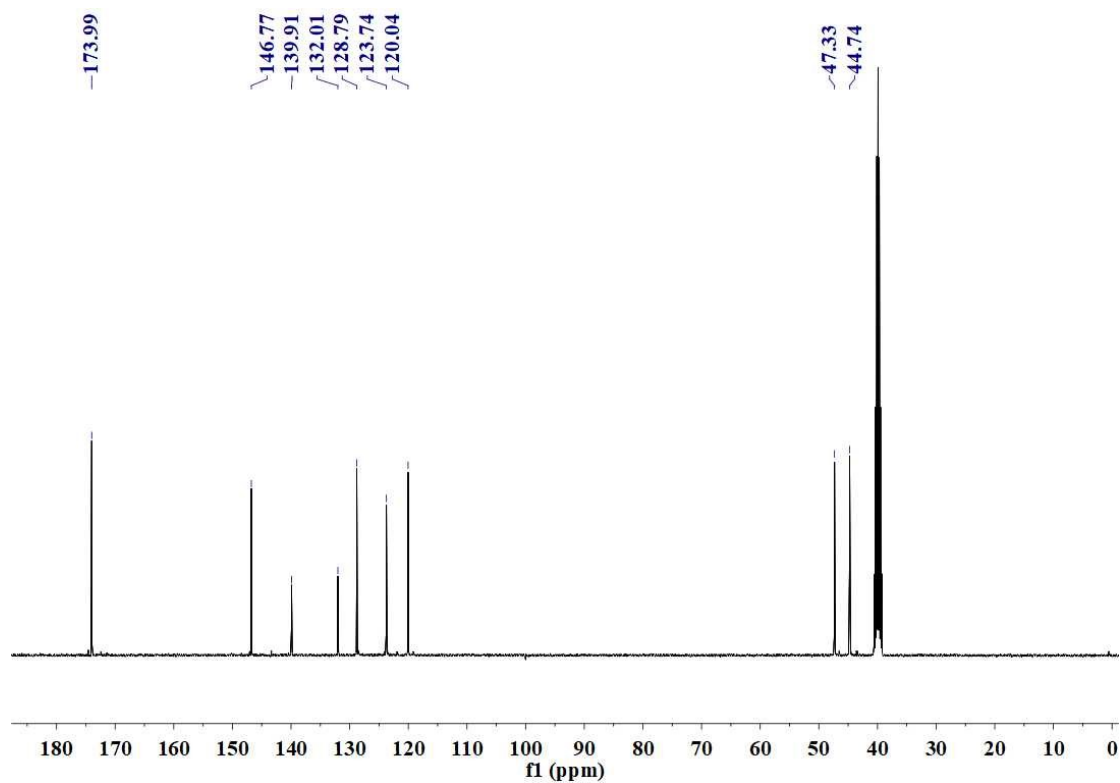

Figure S3  $^{13}C$  NMR spectrum of compound 2 in  $d_6$ -DMSO.

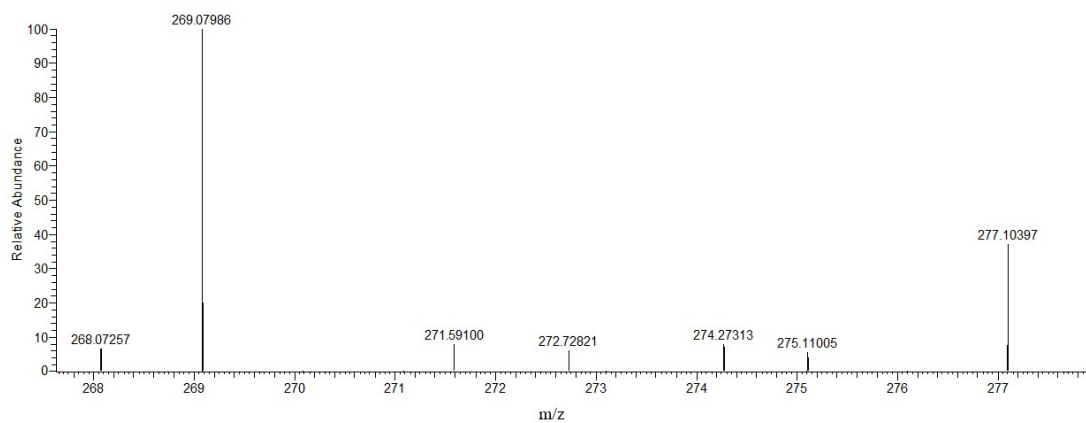

**Figure S4** ESI mass spectrum of compound **2**.

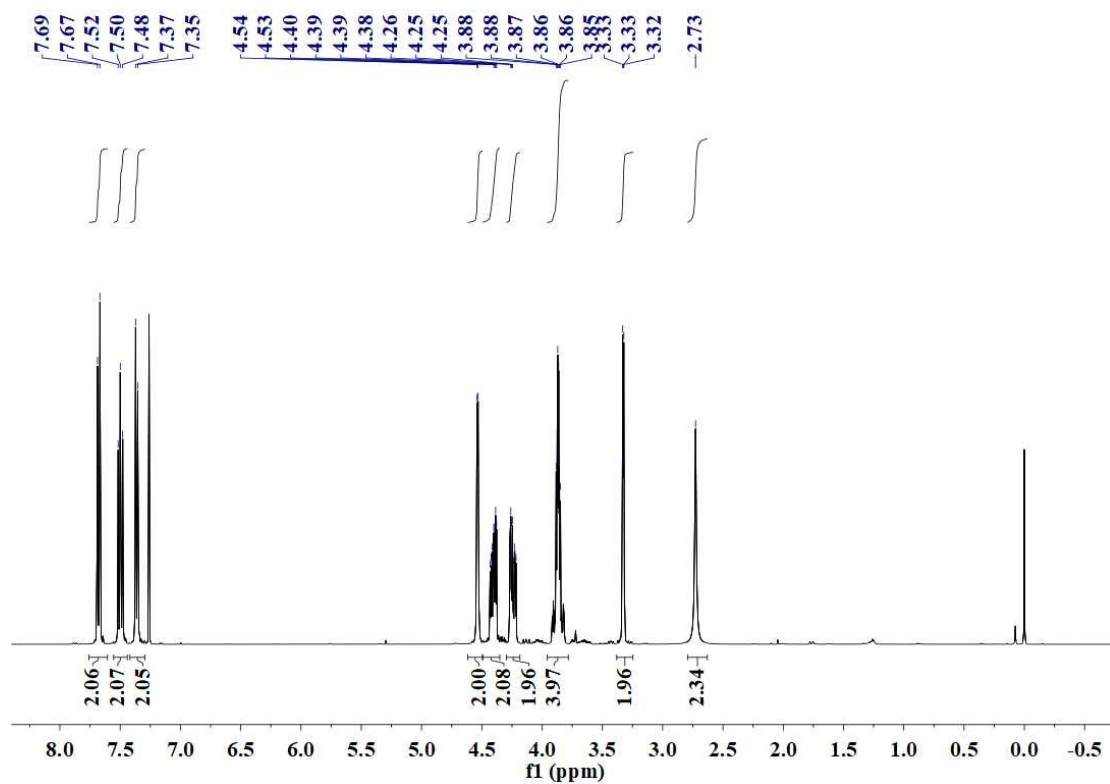

**Figure S5** <sup>1</sup>H NMR spectrum of compound **3** in CDCl<sub>3</sub>.

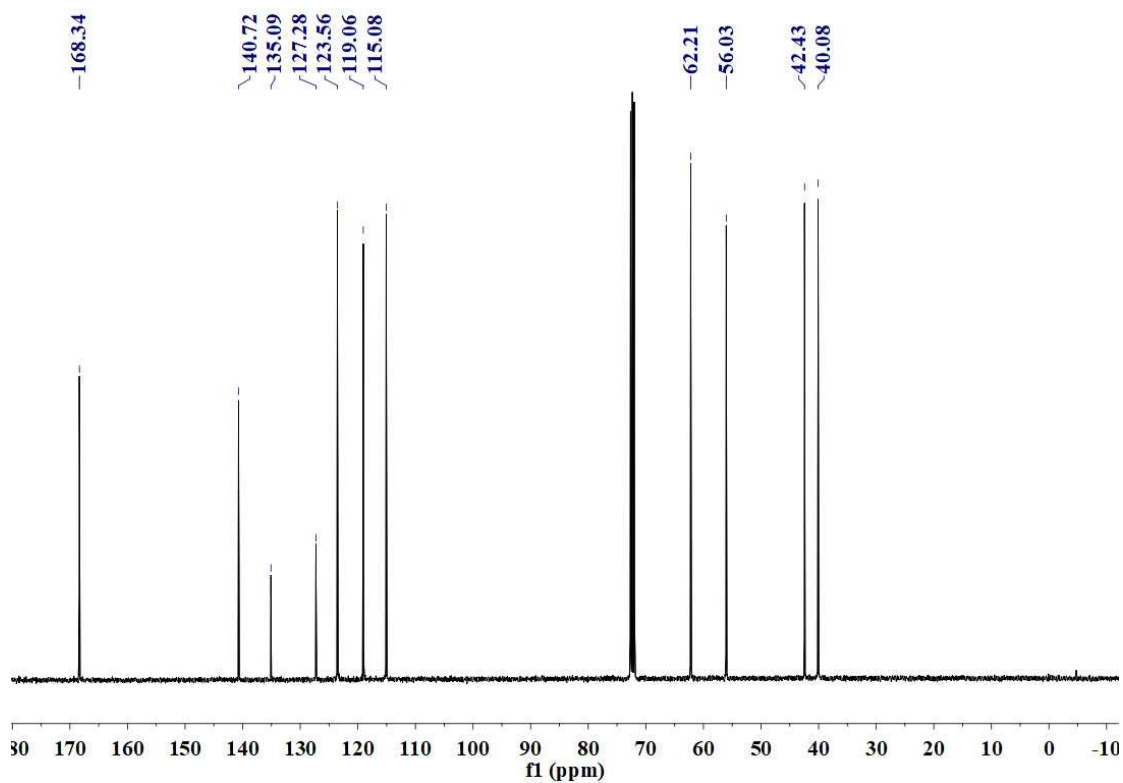

**Figure S6**  $^{13}\text{C}$  NMR spectrum of compound **3** in  $\text{CDCl}_3$ .

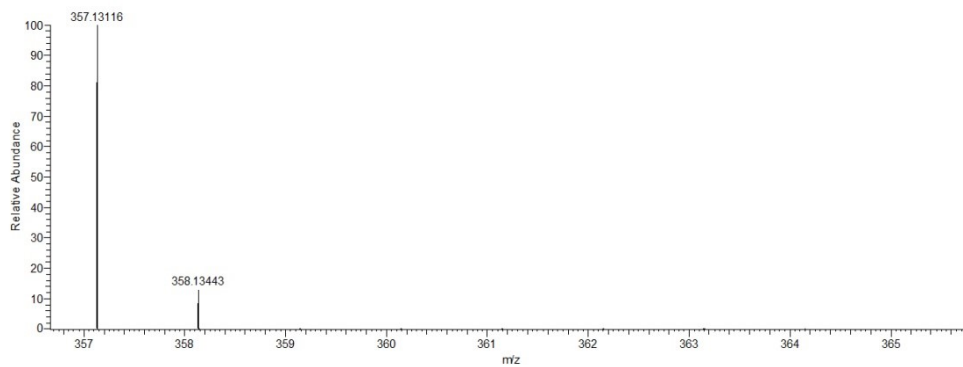

**Figure S7** ESI mass spectrum of compound **3**.

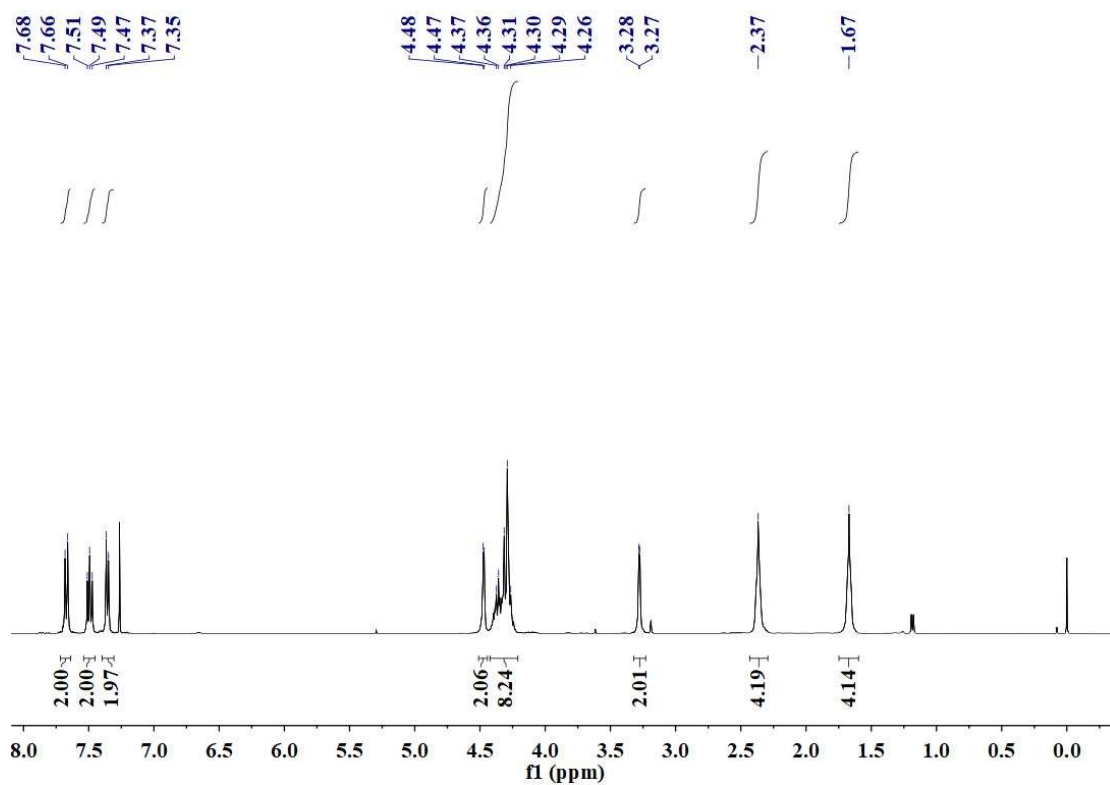

Figure S8  $^1\text{H}$  NMR spectrum of **P1** in  $\text{CDCl}_3$ .

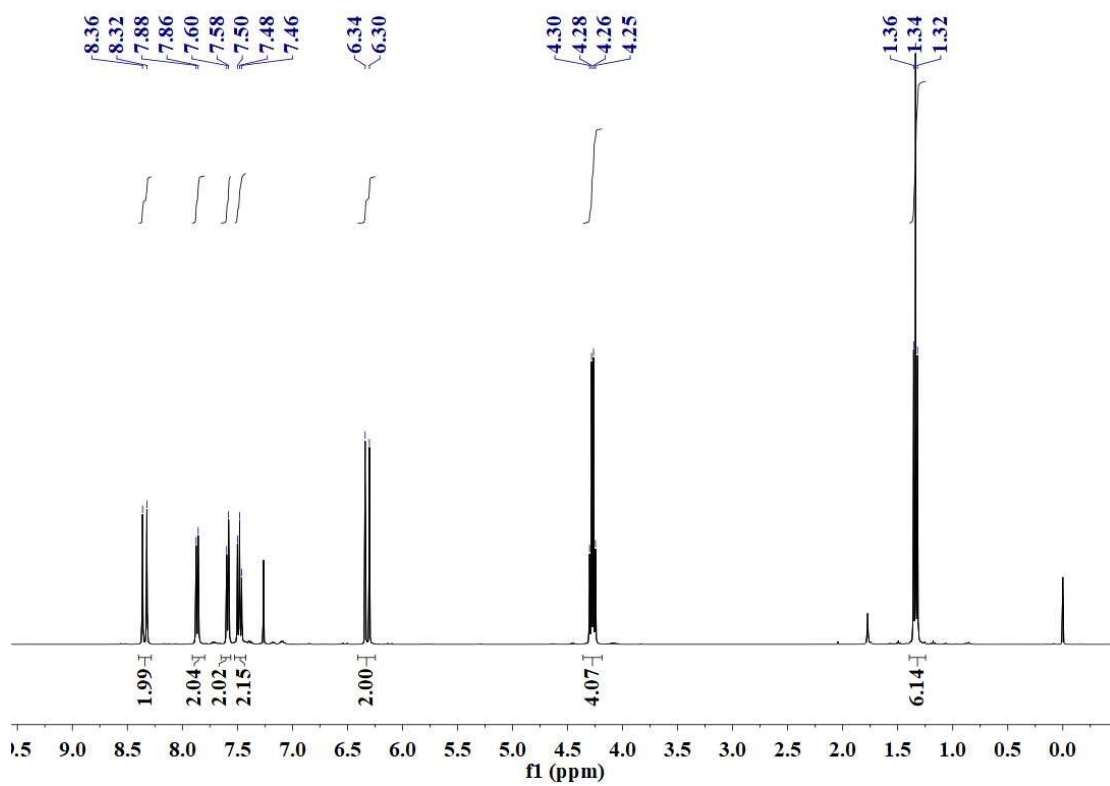

Figure S9  $^1\text{H}$  NMR spectrum of the reference compound **R1** in  $\text{CDCl}_3$ .

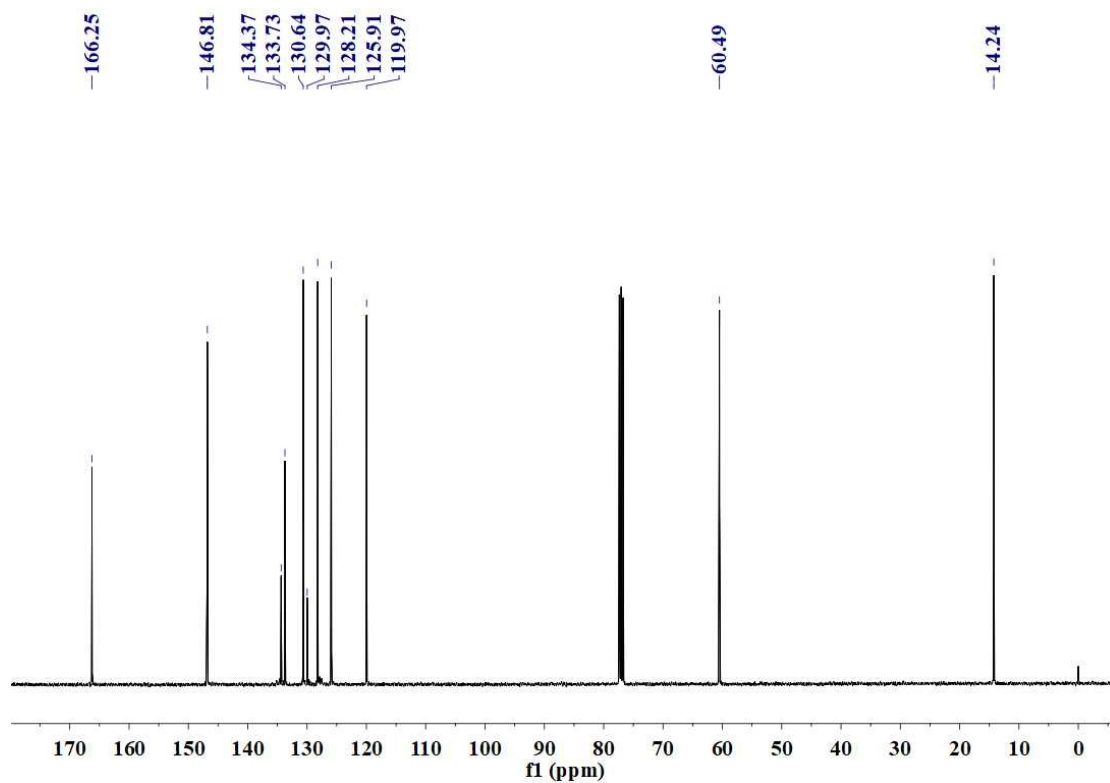

**Figure S10**  $^{13}\text{C}$  NMR spectrum of the reference compound **R1** in  $\text{CDCl}_3$ .

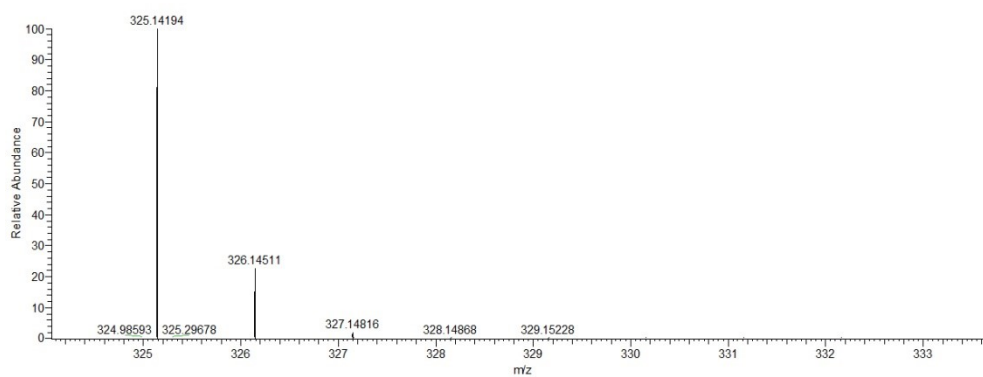

**Figure S11** ESI mass spectrum of reference compound **R1**.



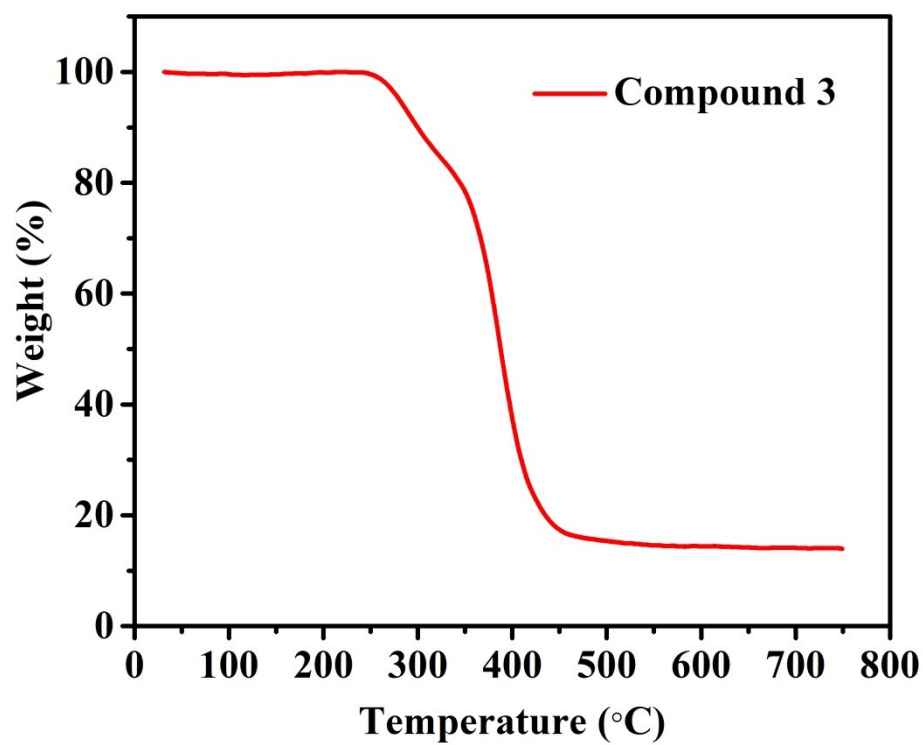

Figure S12 TG curve of the compound 3 in nitrogen atmosphere.

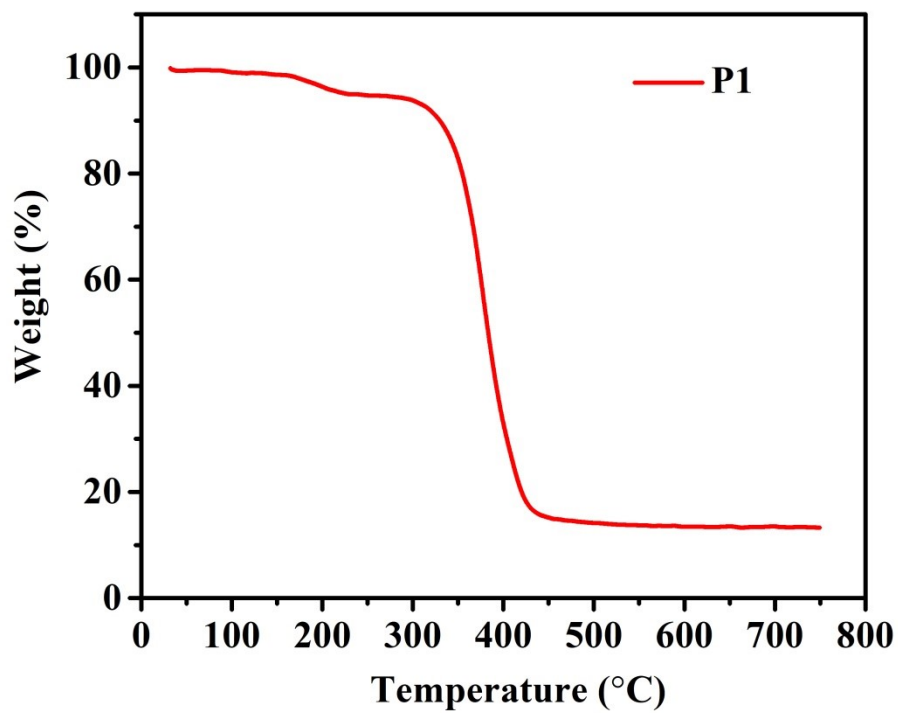

Figure S13 TG curve of the P1 in nitrogen atmosphere.

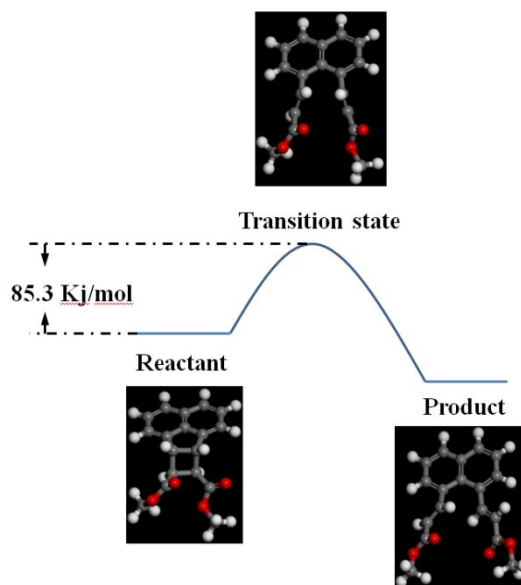

**Figure S14** Transition state search for the transformation of *exo*-NCD mechanophore to *trans,trans* isomer (the energy barrier for the transformation was calculated to be 85.3KJ/mol).

### Structure optimization

To assess the possible release length of the NCD during sonication, we performed geometry optimization calculations for the mechanophore and three retro cycloaddition products. Any unnecessary side groups were omitted to save calculation time. The distances between two oxygens ( $d_{o-o}$ ) on the ester groups were measured for all of the optimized structures (Fig. S15). The value of  $d_{o-o}$  for R2 was 3.5 Å and increased to 6.8 Å (*trans,trans*-R2), 7.5 Å (*trans,cis*-R2) and 7.8 Å (*cis,cis*-R2) after sonication. The calculated stored length for R2 was comparable to those of most of the previous reported systems, such as gem-dibromocyclopropane (<2 Å) and bicyclo[3.2.0]heptane (~4 Å), which demonstrated its potential ability in dissipating strain energy to lower the risk of chain fracture.

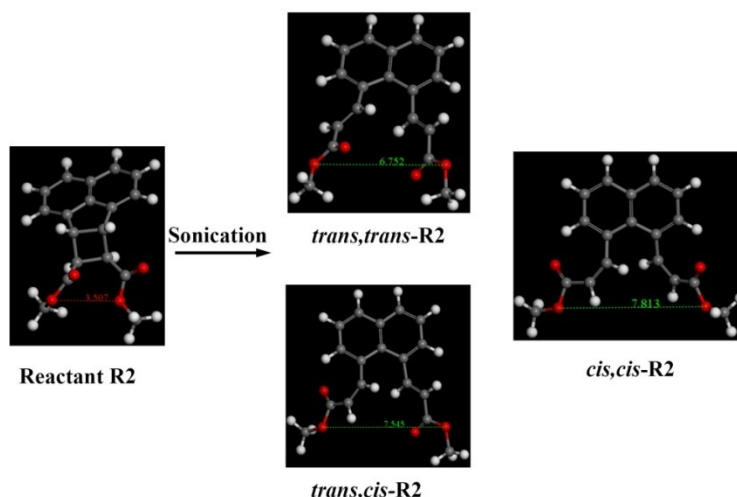

**Figure S15** Theoretical calculation of the elongation of the distance between the two ester O atoms before and after the force-induced retro-cycloaddition reaction. The distances were measured to be 3.5 Å, 6.8 Å, 7.5 Å, and 7.8 Å for modal molecules R2, *trans,trans*-R2, *trans,cis*-R2 and *cis,cis*-R2, respectively.

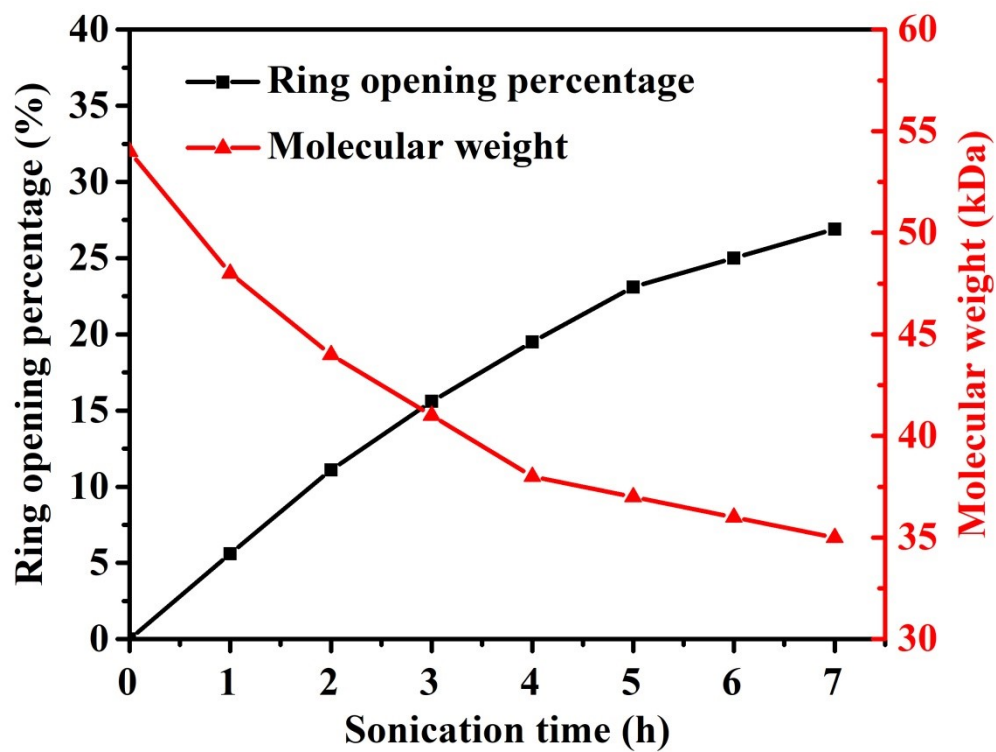

**Figure S16** Ring opening percentage of P1 as a function of sonication time. Molecular weight degradation due to nonspecific chain scission (red) occurs due to high flow forces experienced in pulsed ultrasound.

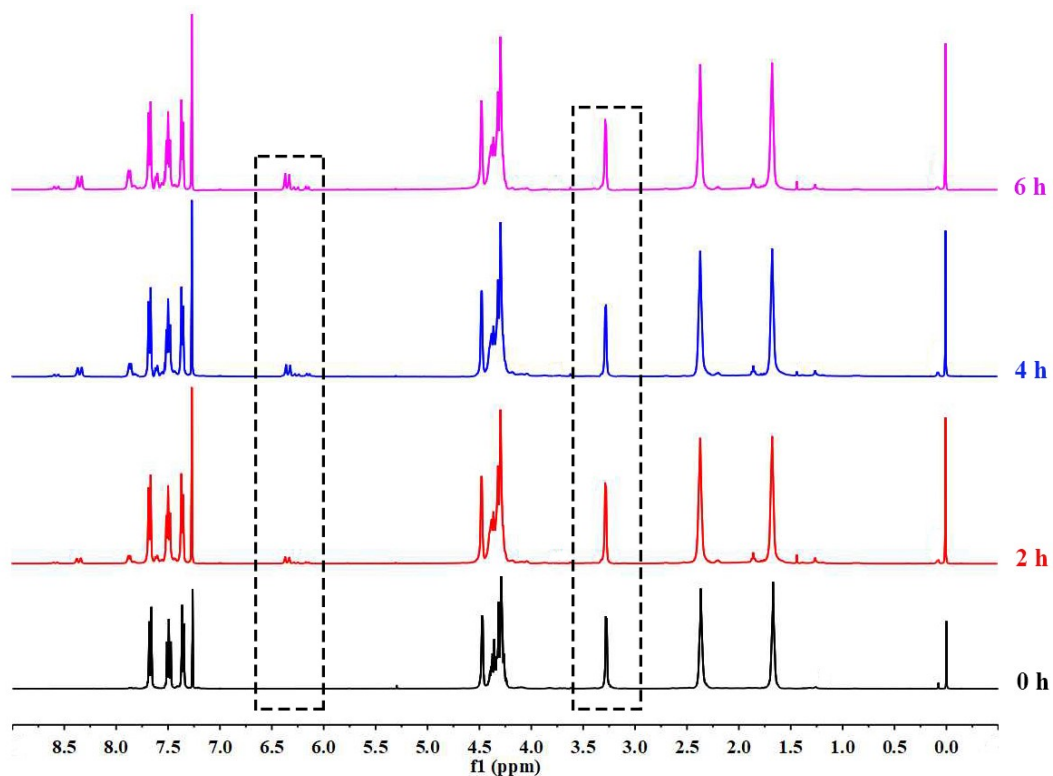

**Figure S17**  $^1\text{H}$  NMR spectra of **P1** as a function of sonication time. The ring opening ratio in **P1** was calculated according to the integral of the proton on vinyl ( $\sim 6.38$  ppm) and cyclobutane ( $\sim 3.37$  ppm).

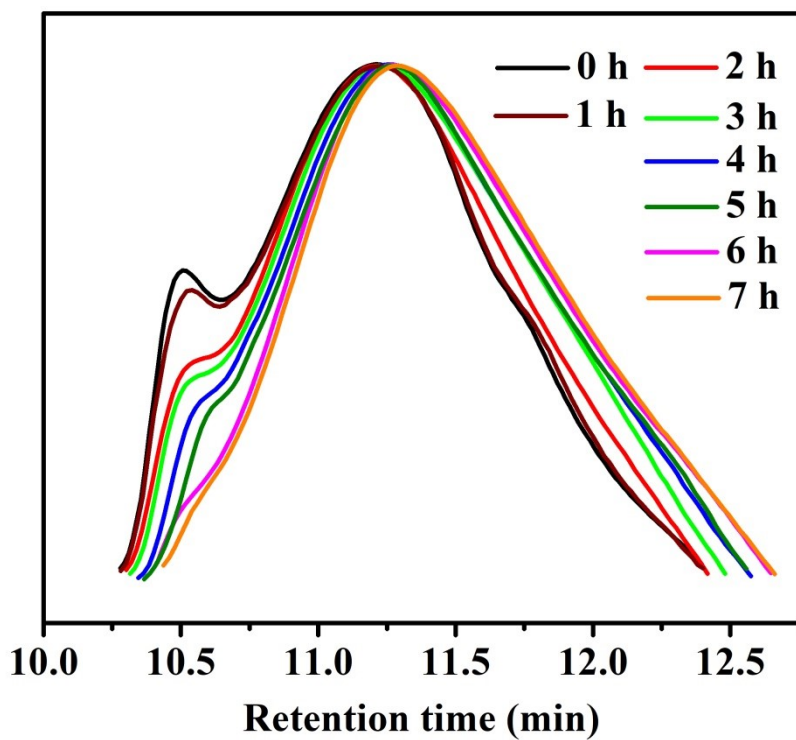

**Figure S18** GPC traces of **P1** with different sonication time.

**Table S1** Molecular parameters of the polymers

| Entry | Sonication time | $M_n$ (KDa) | $M_w$ (KDa) | PDI  |
|-------|-----------------|-------------|-------------|------|
| P1    | 0 h             | 54          | 115         | 2.13 |
| P1    | 1 h             | 48          | 99          | 2.06 |
| P1    | 2 h             | 44          | 83          | 1.88 |
| P1    | 3 h             | 41          | 73          | 1.78 |
| P1    | 4 h             | 38          | 64          | 1.69 |
| P1    | 5 h             | 37          | 61          | 1.65 |
| P1    | 6 h             | 36          | 57          | 1.57 |
| P1    | 7 h             | 35          | 54          | 1.55 |
| P2    | 0 h             | 13          | 30          | 2.32 |

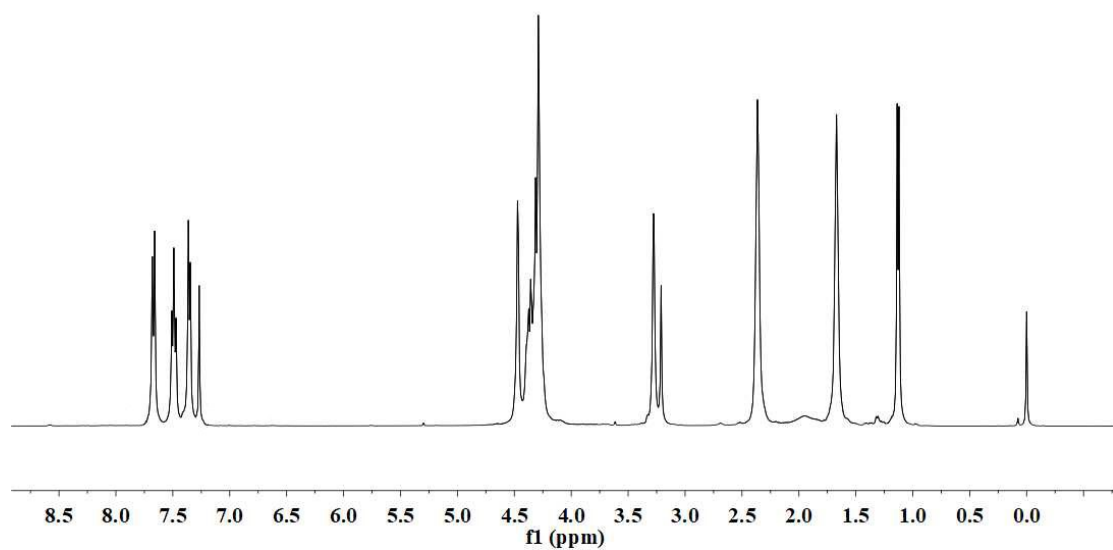

**Figure S19**  $^1\text{H}$  NMR spectrum of **P2** with low molecular weight after sonication for 3 h ( $8.7 \text{ W/cm}^{-2}$ , 2 s on and 2 s off). No change in spectrum was observed.

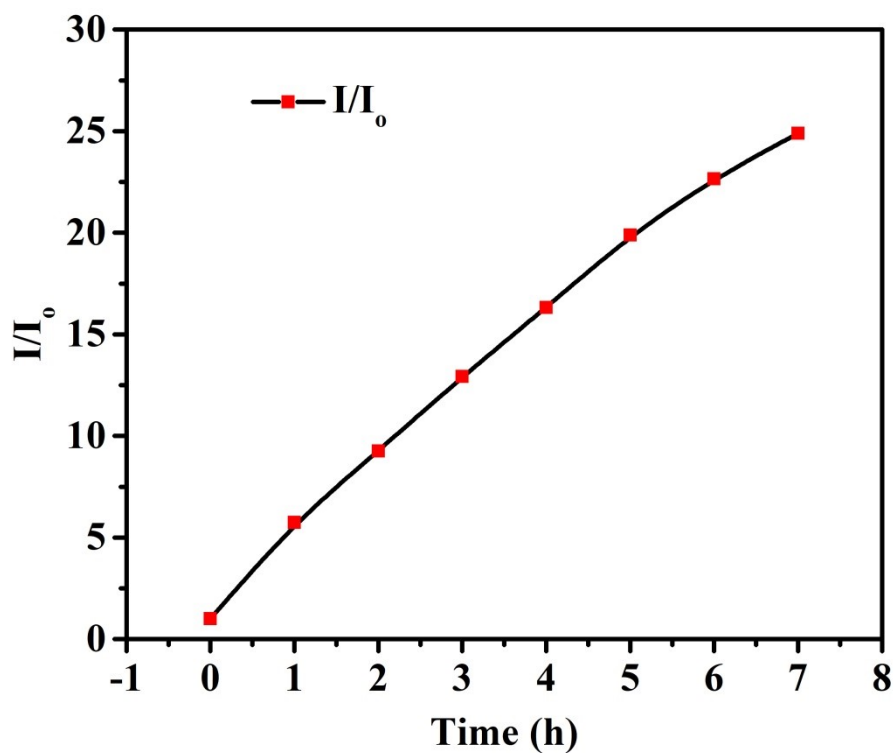

Figure S20 Fluorescent intensity increment at 423 nm for P1 as a function of the sonication time.

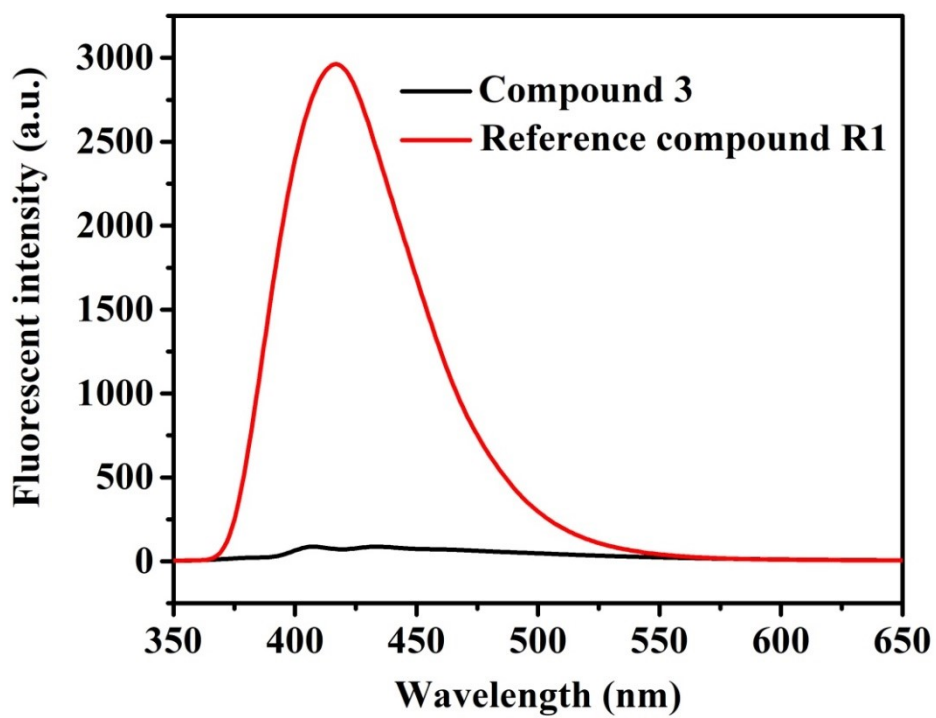

Figure S21 Fluorescent spectra of the compound 3 and R1 (excitation wavelength: 340 nm).

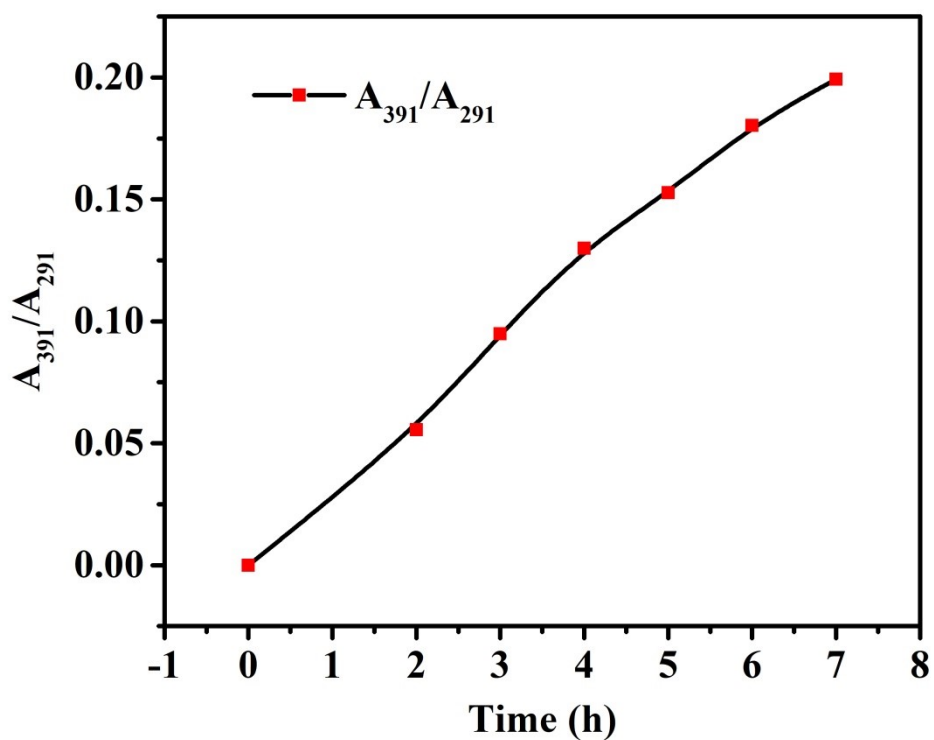

Figure S22 Absorbance ratio of 391 nm and 291 nm as a function of sonication time.

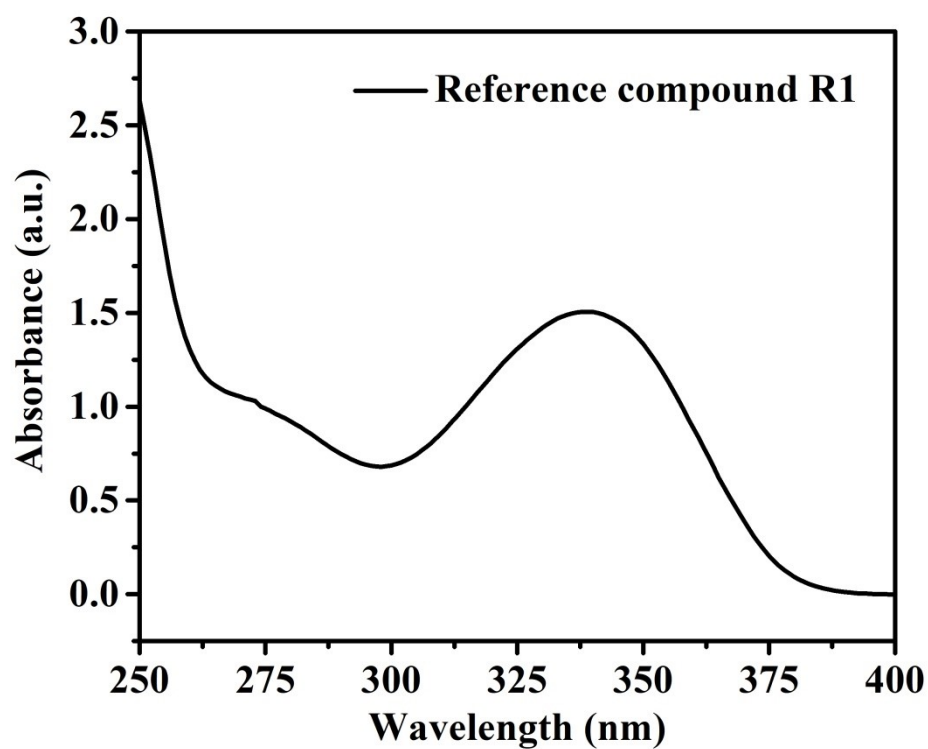

Figure S23 Absorbance spectrum of the reference compound R1.

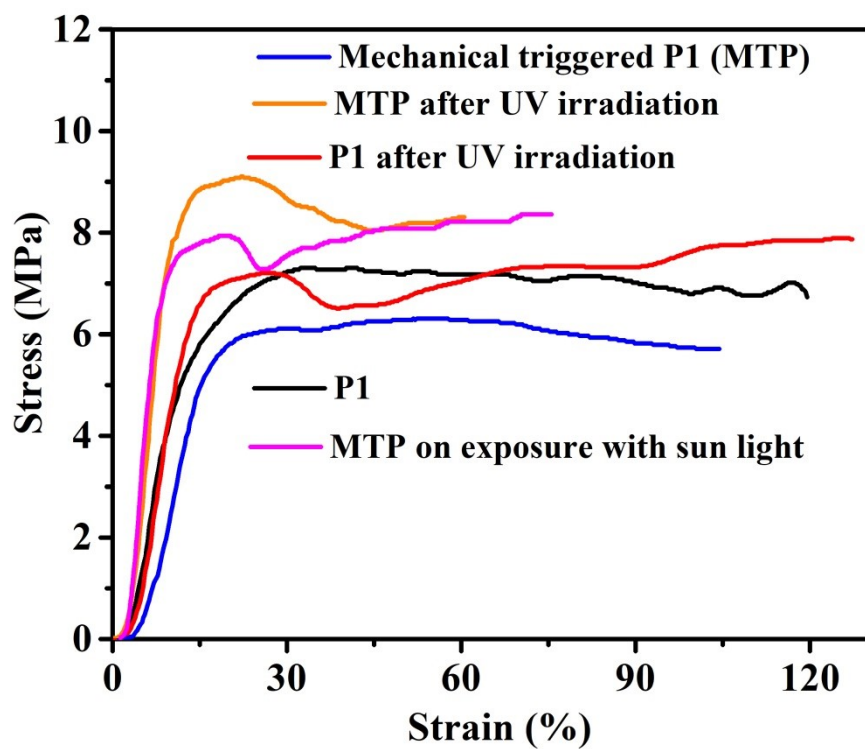

**Figure S24** Stress-strain curves for the **P1** with different conditions. The tensile samples of mechanical triggered P1 (MTP) were prepared by casting a **P1** solution sonicated for 6 h. The times for UV irradiation and sunlight exposure were both 1 h.

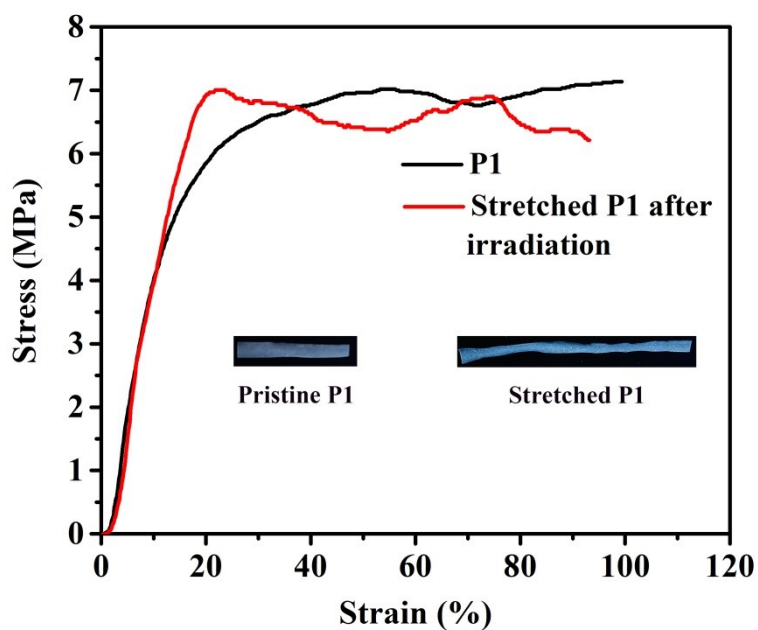

**Figure S25** Stress-strain curves for the **P1** and stretched **P1** after UV irradiation. The inserts showed the fluorescent images of **P1** before and after stretching with hand.



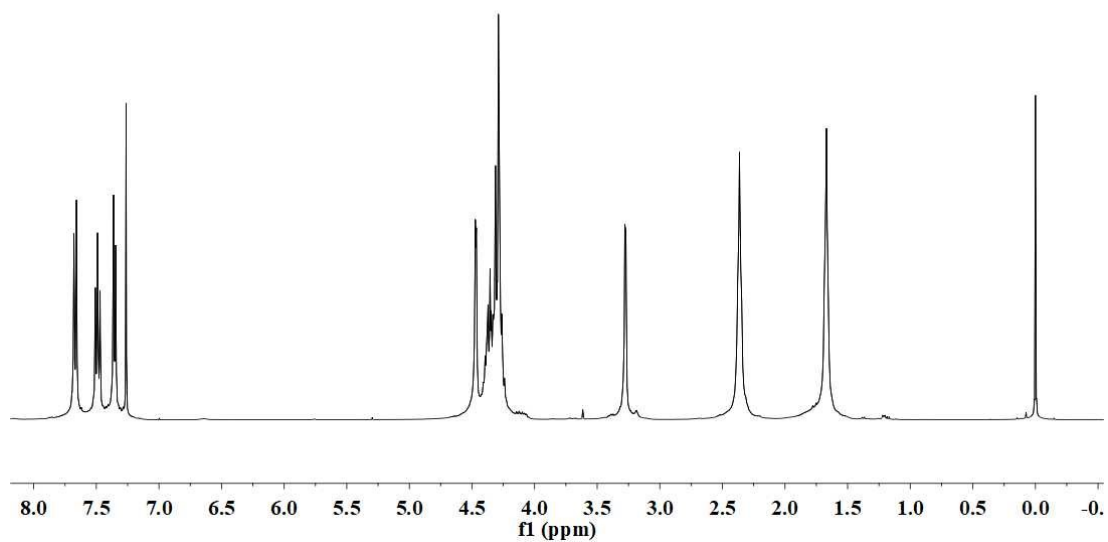

**Figure S26**  $^1\text{H}$  NMR spectrum of the stretched **P1** in  $\text{CDCl}_3$ . The vinyl protons originated from ring opened **NCD** could hardly be seen from  $^1\text{H}$  NMR spectrum.

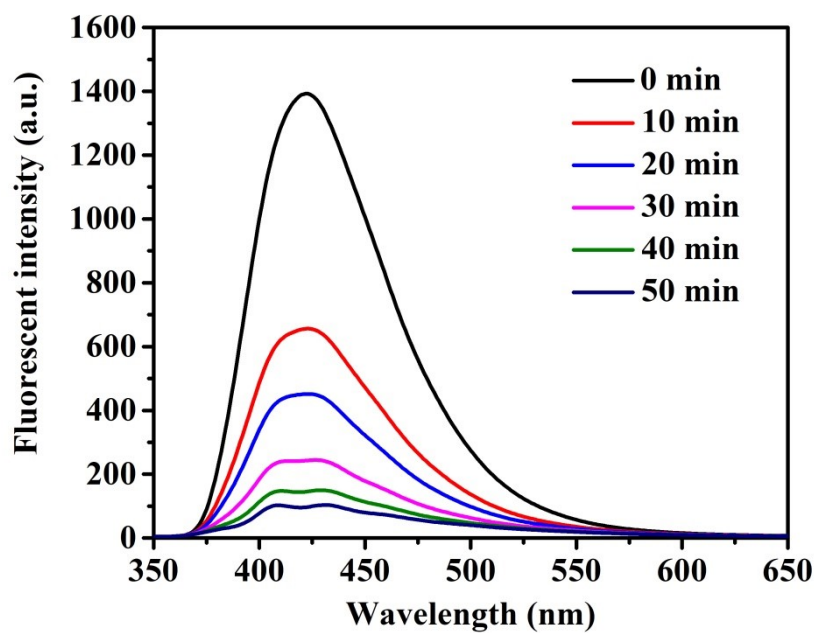

**Figure S27** Fluorescent spectra of sonicated **P1** under the irradiation of UV light (340 nm, 2.1  $\text{mW}/\text{cm}^2$ )

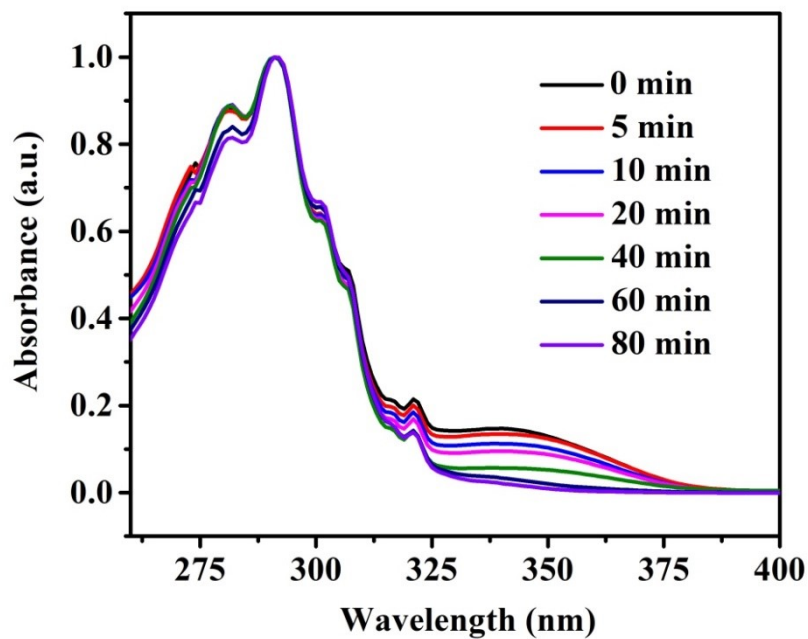

**Figure S28** Absorption spectra of sonicated P1 under the irradiation of UV light (340 nm, 2.1 mW/cm<sup>2</sup>)

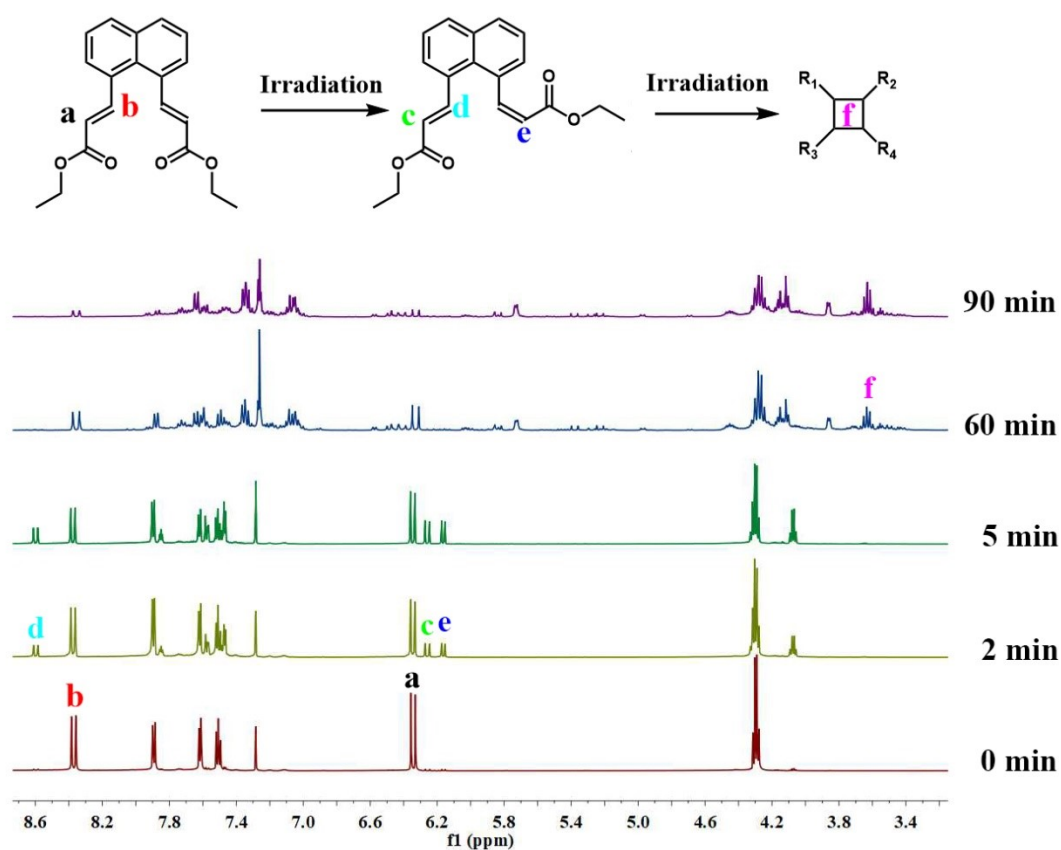

**Figure S29** <sup>1</sup>H NMR spectra of reference compound R1 as a function of irradiation time (340 nm, 2.1 mW/cm<sup>2</sup>).

The coordinates for the optimized structure of modal molecules **R2**

|    |   |           |           |           |
|----|---|-----------|-----------|-----------|
| 1  | C | -2.989353 | 1.629017  | 2.306448  |
| 2  | C | -2.640800 | 0.479563  | 1.547443  |
| 3  | C | -1.304106 | 0.169015  | 1.386152  |
| 4  | C | -0.331295 | 1.007662  | 1.978743  |
| 5  | C | -0.653471 | 2.149070  | 2.752951  |
| 6  | C | -2.035716 | 2.441298  | 2.901254  |
| 7  | C | 0.444740  | 2.868551  | 3.298231  |
| 8  | C | 1.743368  | 2.447220  | 3.056948  |
| 9  | C | 2.041533  | 1.311458  | 2.253522  |
| 10 | C | 0.995464  | 0.590161  | 1.712649  |
| 11 | C | -0.599576 | -0.966809 | 0.683570  |
| 12 | H | -4.046400 | 1.873391  | 2.429371  |
| 13 | H | -3.428424 | -0.140436 | 1.114917  |
| 14 | H | -2.345027 | 3.309056  | 3.487898  |
| 15 | H | 0.261957  | 3.758113  | 3.903629  |
| 16 | H | 2.571887  | 3.008274  | 3.494123  |
| 17 | H | 3.080562  | 1.032360  | 2.070476  |
| 18 | C | 0.928653  | -0.606722 | 0.796876  |
| 19 | C | -0.516861 | -0.883897 | -0.892049 |
| 20 | C | 0.932303  | -0.297470 | -0.732447 |
| 21 | C | -0.548168 | -2.260008 | -1.524067 |
| 22 | O | -1.403294 | -2.514569 | -2.564366 |
| 23 | C | -2.199191 | -1.470415 | -3.155465 |
| 24 | O | 0.144844  | -3.173494 | -1.117113 |
| 25 | C | 2.074273  | -0.857746 | -1.548516 |
| 26 | O | 3.176228  | -1.132470 | -1.112287 |
| 27 | O | 1.724689  | -0.956753 | -2.863806 |
| 28 | C | 2.762425  | -1.489506 | -3.721754 |
| 29 | H | -0.893683 | -1.958302 | 1.051357  |
| 30 | H | 1.597927  | -1.436604 | 1.050830  |
| 31 | H | -1.228621 | -0.181233 | -1.335204 |
| 32 | H | 0.906608  | 0.787584  | -0.912936 |
| 33 | H | -2.940697 | -1.075794 | -2.446263 |
| 34 | H | -2.723541 | -1.950862 | -3.988897 |
| 35 | H | -1.571857 | -0.655934 | -3.544756 |
| 36 | H | 3.653783  | -0.849487 | -3.684426 |
| 37 | H | 2.331250  | -1.497668 | -4.727611 |
| 38 | H | 3.027586  | -2.505611 | -3.405426 |

Sum of atomic energies is -996.64365 Ha.

The coordinates for the optimized structure of *trans,trans*-**R2**

|   |   |           |          |           |
|---|---|-----------|----------|-----------|
| 1 | C | -3.979517 | 1.943898 | -0.342339 |
|---|---|-----------|----------|-----------|

|    |   |           |           |           |
|----|---|-----------|-----------|-----------|
| 2  | C | -3.280586 | 0.732454  | -0.200765 |
| 3  | C | -1.896575 | 0.691955  | -0.027236 |
| 4  | C | -1.151988 | 1.923513  | -0.051003 |
| 5  | C | -1.888762 | 3.157857  | -0.081291 |
| 6  | C | -3.297607 | 3.138390  | -0.243875 |
| 7  | C | -1.204375 | 4.392938  | 0.053903  |
| 8  | C | 0.167659  | 4.427432  | 0.188421  |
| 9  | C | 0.904395  | 3.232306  | 0.111835  |
| 10 | C | 0.286084  | 1.989647  | -0.039925 |
| 11 | C | -1.277495 | -0.587405 | 0.330401  |
| 12 | C | -1.654630 | -1.805695 | -0.115673 |
| 13 | C | -1.011273 | -3.030467 | 0.385643  |
| 14 | O | -1.452105 | -4.114781 | -0.332910 |
| 15 | C | -0.822101 | -5.362559 | 0.022497  |
| 16 | O | -0.199074 | -3.111371 | 1.296441  |
| 17 | C | 1.121649  | 0.821288  | -0.328771 |
| 18 | C | 2.361180  | 0.587441  | 0.156073  |
| 19 | H | -5.062865 | 1.931121  | -0.469349 |
| 20 | H | -3.841560 | -0.201164 | -0.144885 |
| 21 | H | -3.832274 | 4.089643  | -0.282753 |
| 22 | H | -1.786359 | 5.316748  | 0.043163  |
| 23 | H | 0.692322  | 5.377728  | 0.292929  |
| 24 | H | 1.993826  | 3.280470  | 0.090220  |
| 25 | H | -0.469021 | -0.559269 | 1.065501  |
| 26 | H | -2.406880 | -1.932179 | -0.894773 |
| 27 | H | 0.264976  | -5.299831 | -0.124667 |
| 28 | H | -1.258487 | -6.109823 | -0.649306 |
| 29 | H | -1.028070 | -5.614962 | 1.071004  |
| 30 | H | 0.726120  | 0.093447  | -1.041812 |
| 31 | H | 2.815898  | 1.215887  | 0.922344  |
| 32 | C | 3.146162  | -0.575021 | -0.285933 |
| 33 | O | 4.297874  | -0.664980 | 0.457903  |
| 34 | C | 5.132153  | -1.797188 | 0.137133  |
| 35 | O | 2.854093  | -1.362375 | -1.175031 |
| 36 | H | 5.468766  | -1.746414 | -0.906910 |
| 37 | H | 4.583341  | -2.735773 | 0.292206  |
| 38 | H | 5.985104  | -1.732906 | 0.821590  |

Sum of atomic energies is -996.6455728 Ha

The coordinates for the optimized structure of *trans,cis*-**R2**.

|   |   |           |           |           |
|---|---|-----------|-----------|-----------|
| 1 | C | -4.139220 | 0.962106  | 0.566646  |
| 2 | C | -3.261943 | -0.132305 | 0.491396  |
| 3 | C | -1.904429 | 0.020960  | 0.202625  |
| 4 | C | -1.388448 | 1.336194  | -0.077206 |

|    |   |           |           |           |
|----|---|-----------|-----------|-----------|
| 5  | C | -2.283521 | 2.454254  | 0.068733  |
| 6  | C | -3.648541 | 2.237616  | 0.385683  |
| 7  | C | -1.803275 | 3.776387  | -0.110787 |
| 8  | C | -0.486045 | 4.007779  | -0.441773 |
| 9  | C | 0.380680  | 2.922707  | -0.654178 |
| 10 | C | -0.037366 | 1.602360  | -0.502153 |
| 11 | C | -1.047978 | -1.162688 | 0.305073  |
| 12 | C | -1.403971 | -2.423168 | -0.031492 |
| 13 | C | -0.487913 | -3.551665 | 0.193366  |
| 14 | O | -1.057676 | -4.720354 | -0.252951 |
| 15 | C | -0.225218 | -5.886804 | -0.083262 |
| 16 | O | 0.631426  | -3.497965 | 0.685445  |
| 17 | C | 0.844794  | 0.523823  | -0.960149 |
| 18 | C | 2.183831  | 0.337950  | -0.851899 |
| 19 | H | -5.188937 | 0.799448  | 0.815220  |
| 20 | H | -3.629789 | -1.128363 | 0.738754  |
| 21 | H | -4.302273 | 3.105475  | 0.489804  |
| 22 | H | -2.501483 | 4.606281  | 0.014822  |
| 23 | H | -0.117331 | 5.025657  | -0.576364 |
| 24 | H | 1.398014  | 3.112012  | -0.986745 |
| 25 | H | -0.047922 | -1.029945 | 0.724976  |
| 26 | H | -2.362522 | -2.647891 | -0.499983 |
| 27 | H | 0.727514  | -5.759655 | -0.613669 |
| 28 | H | -0.797539 | -6.717391 | -0.508995 |
| 29 | H | -0.020638 | -6.062010 | 0.981313  |
| 30 | H | 0.328138  | -0.251366 | -1.534124 |
| 31 | H | 2.610812  | -0.530899 | -1.352420 |
| 32 | C | 3.155930  | 1.101191  | -0.052510 |
| 33 | O | 4.389338  | 0.499713  | -0.166435 |
| 34 | C | 5.432696  | 1.134755  | 0.599481  |
| 35 | O | 2.969164  | 2.090301  | 0.643702  |
| 36 | H | 5.566591  | 2.177147  | 0.279299  |
| 37 | H | 6.335986  | 0.549647  | 0.400615  |
| 38 | H | 5.189063  | 1.118705  | 1.670143  |

Sum of atomic energies is -996.6392238 Ha.

The coordinates for the optimized structure of *cis,cis*-**R2**

|   |   |           |           |          |
|---|---|-----------|-----------|----------|
| 1 | C | -3.809878 | 0.875625  | 0.597990 |
| 2 | C | -2.921792 | -0.209338 | 0.509684 |
| 3 | C | -1.554700 | -0.025183 | 0.295263 |
| 4 | C | -1.053178 | 1.311687  | 0.073701 |
| 5 | C | -1.957507 | 2.414095  | 0.262436 |
| 6 | C | -3.329998 | 2.165903  | 0.520140 |
| 7 | C | -1.478312 | 3.746653  | 0.177359 |

|    |   |           |           |           |
|----|---|-----------|-----------|-----------|
| 8  | C | -0.152999 | 4.001622  | -0.106479 |
| 9  | C | 0.720796  | 2.934721  | -0.375346 |
| 10 | C | 0.299738  | 1.606154  | -0.324100 |
| 11 | C | -0.613300 | -1.122235 | 0.517681  |
| 12 | C | -0.663345 | -2.477078 | 0.405122  |
| 13 | C | 1.161902  | 0.564093  | -0.894420 |
| 14 | C | 2.503755  | 0.359910  | -0.862062 |
| 15 | H | -4.870327 | 0.690814  | 0.770024  |
| 16 | H | -3.296755 | -1.220291 | 0.645510  |
| 17 | H | -4.000186 | 3.018116  | 0.652170  |
| 18 | H | -2.180813 | 4.568842  | 0.332244  |
| 19 | H | 0.212900  | 5.026590  | -0.170801 |
| 20 | H | 1.742545  | 3.144160  | -0.680967 |
| 21 | H | 0.345978  | -0.769975 | 0.905030  |
| 22 | H | 0.228597  | -3.015170 | 0.727339  |
| 23 | H | 0.613187  | -0.153569 | -1.513249 |
| 24 | H | 2.896129  | -0.462568 | -1.461562 |
| 25 | C | 3.524692  | 1.028046  | -0.039881 |
| 26 | O | 4.743277  | 0.430829  | -0.287058 |
| 27 | C | 5.839195  | 0.934994  | 0.501938  |
| 28 | O | 3.387497  | 1.938720  | 0.765726  |
| 29 | H | 5.981396  | 2.010948  | 0.334799  |
| 30 | H | 6.717224  | 0.372551  | 0.165895  |
| 31 | H | 5.657314  | 0.758991  | 1.570808  |
| 32 | C | -1.693896 | -3.367762 | -0.140466 |
| 33 | O | -1.189187 | -4.652154 | -0.159563 |
| 34 | C | -2.087671 | -5.641449 | -0.696001 |
| 35 | O | -2.820967 | -3.103778 | -0.542001 |
| 36 | H | -1.531103 | -6.585074 | -0.674683 |
| 37 | H | -2.377738 | -5.386545 | -1.723402 |
| 38 | H | -2.992471 | -5.711895 | -0.078816 |

Sum of atomic energies is -996.6307202 Ha.

### References

- [S1] Neese, F.; ORCA-an ab initio, Density Functional and Semiempirical Program Package Version 2.8 2011, Universität Bonn, Bonn, Germany.
- [S2] Peng, C. Y., Ayala, P. Y., Schlegel, H. B. & Frisch, M. J. Using redundant internal coordinates to optimize equilibrium geometries and transition states. *J. Comput. Chem.* 17, 1996, 49-56.
